# Supplementary material for: Plant Development of Early-Maturing Spring Wheat (Triticum aestivum L.) under Inoculation with Bacillus sp. V2026
Source: MDPI journal article supplement (doi:10.3390/plants11141817), 2022-07-10
Supplement: s1 [file s1]

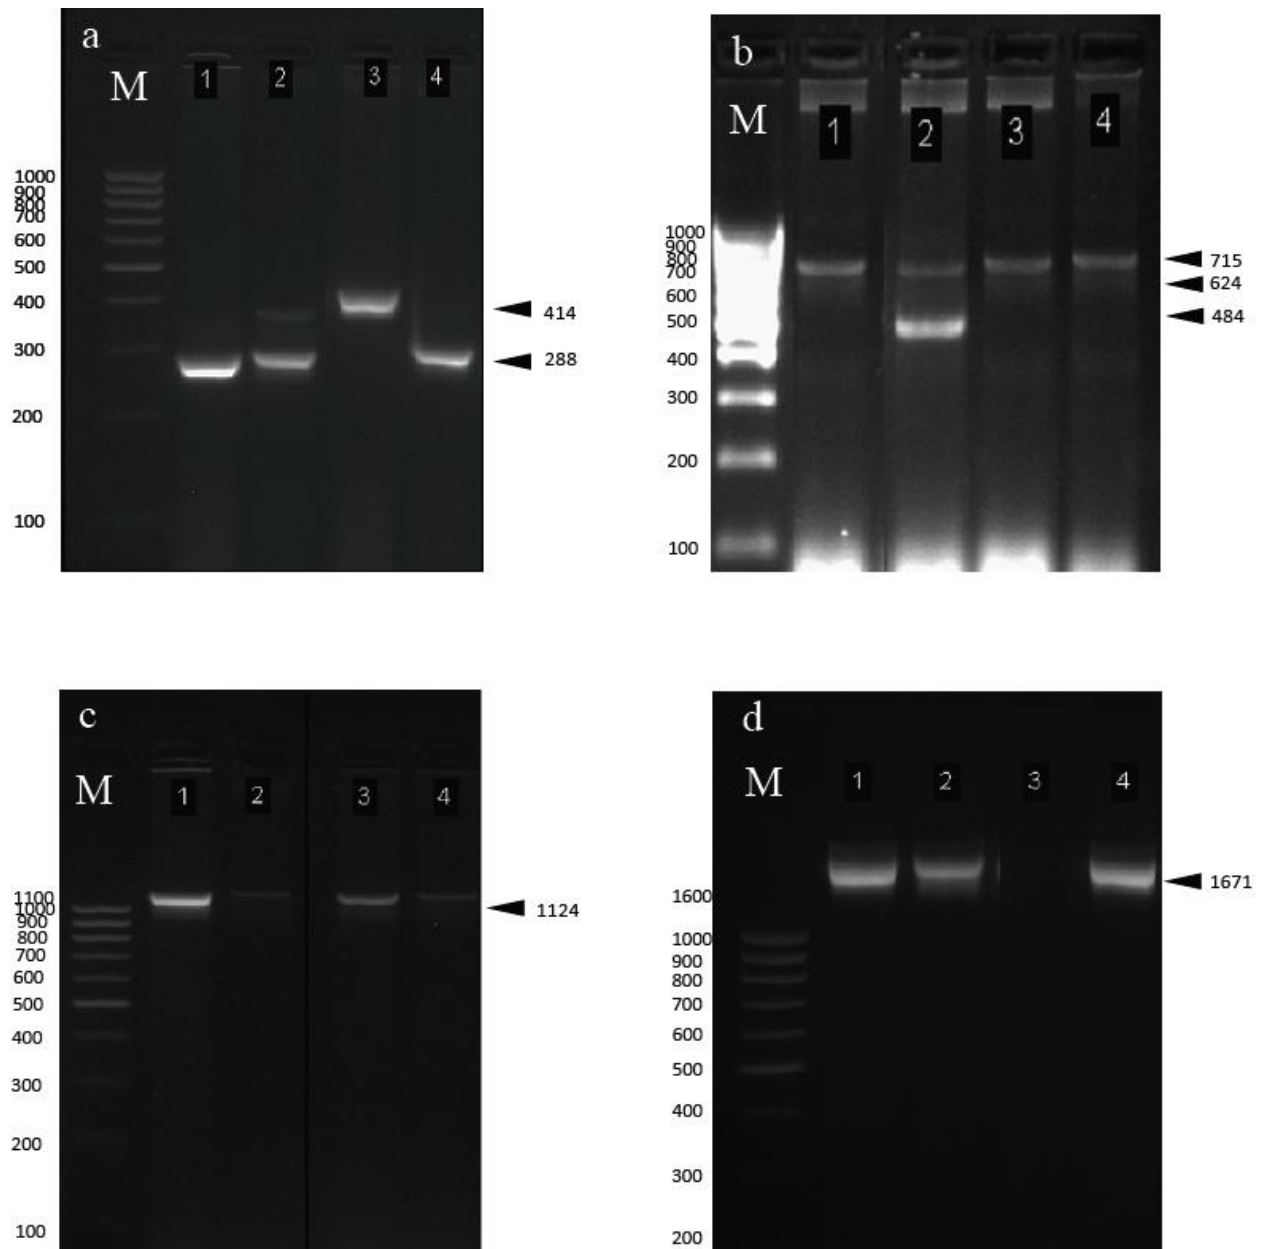

**Figure S1.** Identification of dominant (288 b.p.) and recessive (414 b.p.) alleles of *Ppd-D1* gene(a), dominant (715+624 b.p.) and recessive (484 b.p.) alleles of *Vrn-A1* gene(b), dominant (1124 b.p.) allele of *Vrn-B1* gene(c), and dominant (1671 b.p.) allele of *Vrn-D1* gene(d), in wheat varieties by PCR with allele-specific markers. Wheat varieties: 1- AFI-177, 2- AFI-91, 3- Leningradskaya rannya, 4- Sonora-64; M-DNA ladder.

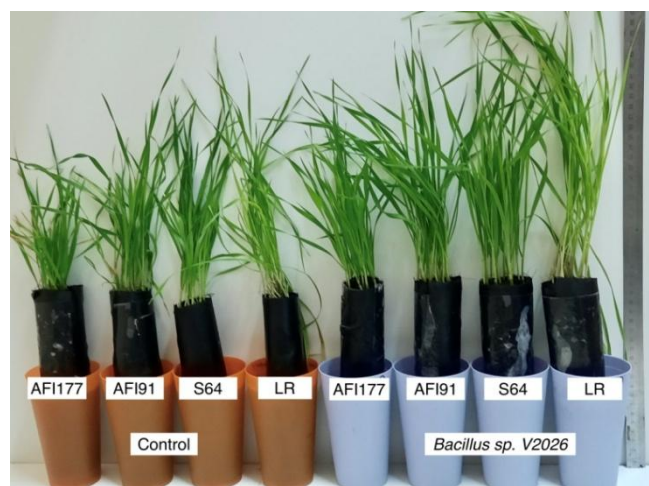

(a)

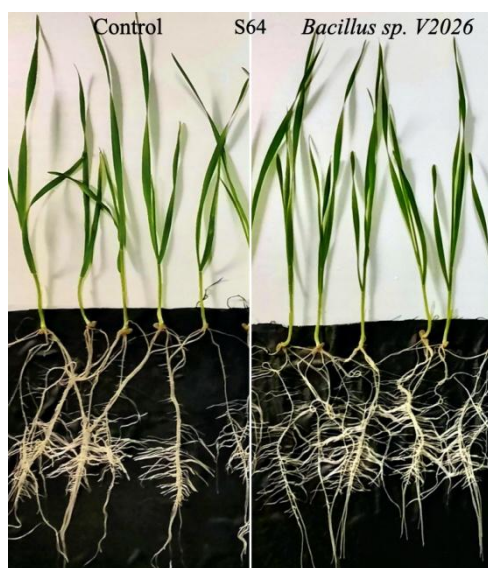

(b)

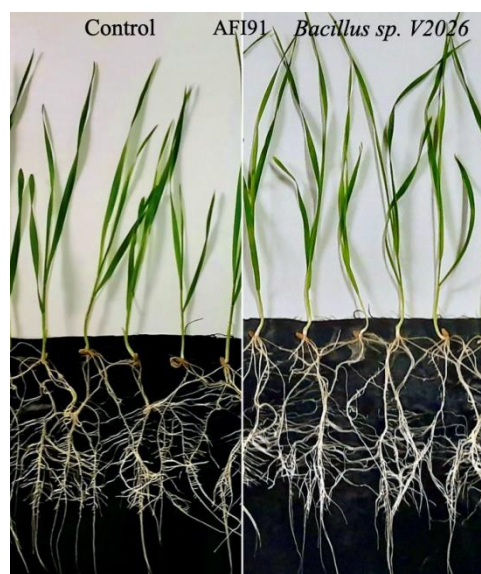

(c)

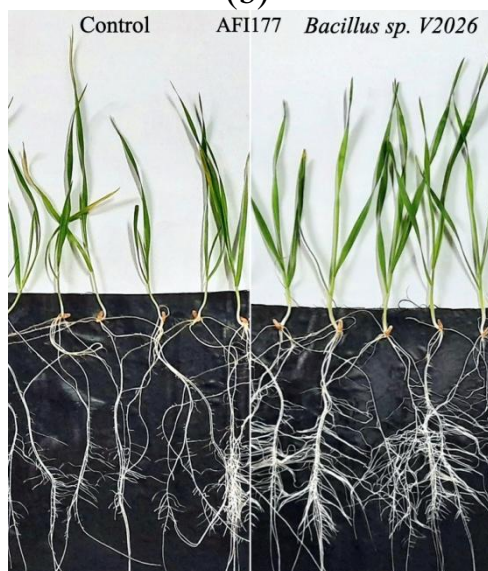

(d)

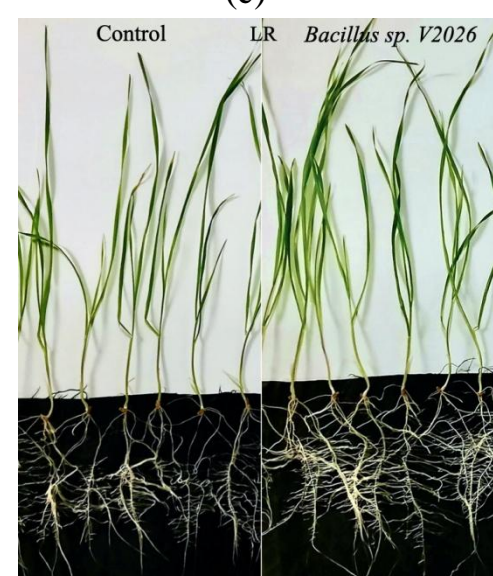

(e)

**Figure S2.** Effect of inoculation with *Bacillus* sp. V2026 on wheat seedlings of early-maturing genotypes (a): 14-day old wheat seedlings in hydroponic experiments; (b): plants of cv.S64 without treatment (control) and inoculated with *Bacillus* sp. V2026; (c): ultra-early-maturing line AFI91 without treatment (control) and inoculated with *Bacillus* sp. V2026 plants; (d): ultra-early-maturing line AFI177 without treatment (control) and inoculated with *Bacillus* sp. V2026 plants; (e): plants of cv.LR without treatment (control) and inoculated with *Bacillus* sp. V2026.

**Table S1.** Morphological, physiological and biochemical characteristics of the studied strain

| <b>Characteristics</b>      | <b><i>Bacillus sp. V2026</i></b> |
|-----------------------------|----------------------------------|
| Gram staining               | +                                |
| Cell shape                  | Rod                              |
| Spore-forming               | +                                |
| Morphology of colonies      | Round, white, smooth             |
| Motile                      | +                                |
| Oxidase                     | +                                |
| Catalase                    | -                                |
| Indole                      | -                                |
| H <sub>2</sub> S            | -                                |
| Growth at 5 <sup>0</sup> C  | +                                |
| Growth at 40 <sup>0</sup> C | +                                |
| Growth on 6% NaCl           | +                                |
| Voges-Proskauer             | -                                |
| <b>Utilization of</b>       |                                  |
| Glucose                     | +                                |
| Sucrose                     | +                                |
| xylose                      | +                                |
| arabinose                   | +                                |
| maltose                     | +                                |
| sorbitol                    | +                                |
| mannitol                    | +                                |

**Table S2.** Analysis of variance (ANOVA) for genotype and *Bacillus sp.* V2026 effect on various traits four spring wheat genotypes

| Trait                           | Source of Variation  | df | MS      | F-value | P-value |
|---------------------------------|----------------------|----|---------|---------|---------|
| Productivity Wheat yield traits |                      |    |         |         |         |
| Plant height                    | Genotype             | 3  | 14090.0 | 1251.2  | 0.001   |
|                                 | Treatment            | 1  | 81.9    | 7.27    | 0.01    |
|                                 | Genotype x Treatment | 3  | 36.9    | 3.28    | 0.05    |
| Spike length                    | Genotype             | 3  | 70.39   | 275.81  | 0.001   |
|                                 | Treatment            | 1  | 9.03    | 35.39   | 0.001   |
|                                 | Genotype x Treatment | 3  | 0.66    | 2.60    | ns      |
| Number of productive tillers    | Genotype             | 3  | 24.73   | 20.79   | 0.001   |
|                                 | Treatment            | 1  | 63.85   | 53.69   | 0.001   |
|                                 | Genotype x Treatment | 3  | 1.62    | 1.361   | ns      |
| Number of spikelets/ spike      | Genotype             | 3  | 215.3   | 239.33  | 0.001   |
|                                 | Treatment            | 1  | 51.01   | 56.70   | 0.001   |
|                                 | Genotype x Treatment | 3  | 0.75    | 0.84    | ns      |
| Number of grains/ spike         | Genotype             | 3  | 894.2   | 78.19   | 0.001   |
|                                 | Treatment            | 1  | 816.1   | 71.36   | 0.001   |
|                                 | Genotype x Treatment | 3  | 43.8    | 3.83    | 0.05    |
| Grain weight/ spike             | Genotype             | 3  | 0.108   | 6.20    | 0.001   |
|                                 | Treatment            | 1  | 1.621   | 93.36   | 0.001   |
|                                 | Genotype x Treatment | 3  | 0.023   | 1.30    | ns      |
| Number of grains/ plant         | Genotype             | 3  | 56698   | 82.49   | 0.001   |
|                                 | Treatment            | 1  | 67896   | 98.79   | 0.001   |
|                                 | Genotype x Treatment | 3  | 10830   | 15.76   | 0.001   |
| Grain yield                     | Genotype             | 3  | 8.39    | 14.08   | 0.001   |
|                                 | Treatment            | 1  | 72.92   | 122.35  | 0.001   |
|                                 | Genotype x Treatment | 3  | 1.81    | 3.04    | 0.05    |
| Harvest index                   | Genotype             | 3  | 0.060   | 94.28   | 0.001   |
|                                 | Treatment            | 1  | 0.062   | 98.58   | 0.001   |
|                                 | Genotype x Treatment | 3  | 0.010   | 15.82   | 0.001   |
| 1000 grain weight               | Genotype             | 3  | 1169.4  | 103.73  | 0.001   |
|                                 | Treatment            | 1  | 303.5   | 26.92   | 0.001   |
|                                 | Genotype x Treatment | 3  | 34.0    | 3.02    | 0.05    |
| Straw yield                     | Genotype             | 3  | 38.30   | 47.06   | 0.001   |
|                                 | Treatment            | 1  | 33.33   | 40.95   | 0.001   |
|                                 | Genotype x Treatment | 3  | 0.30    | 0.37    | ns      |
| Chaff to grain ratio            | Genotype             | 3  | 0.008   | 7.41    | 0.001   |
|                                 | Treatment            | 1  | 0.193   | 185.17  | 0.001   |
|                                 | Genotype x Treatment | 3  | 0.006   | 5.97    | 0.001   |
| Onthogenesis                    |                      |    |         |         |         |
| Seedling-tillering              | Genotype             | 3  | 9.93    | 33.86   | 0.001   |
|                                 | Treatment            | 1  | 25.92   | 88.36   | 0.001   |
|                                 | Genotype x Treatment | 3  | 0.41    | 1.41    | ns      |
| Tillering-stem elongation       | Genotype             | 3  | 109.50  | 177.69  | 0.001   |
|                                 | Treatment            | 1  | 60.50   | 98.17   | 0.001   |
|                                 | Genotype x Treatment | 3  | 4.70    | 7.63    | 0.001   |
| Seedling-stem elongation        | Genotype             | 3  | 69.71   | 129.90  | 0.001   |
|                                 | Treatment            | 1  | 165.62  | 308.61  | 0.001   |
|                                 | Genotype x Treatment | 3  | 7.13    | 13.28   | 0.001   |

|                                                          |                      |   |          |         |       |
|----------------------------------------------------------|----------------------|---|----------|---------|-------|
| Stem elongation-heading                                  | Genotype             | 3 | 715.36   | 725.03  | 0.001 |
|                                                          | Treatment            | 1 | 3.38     | 3.43    | ns    |
|                                                          | Genotype x Treatment | 3 | 1.41     | 1.43    | ns    |
| Seedling-heading                                         | Genotype             | 3 | 1076.4   | 1400.9  | 0.001 |
|                                                          | Treatment            | 1 | 214.2    | 278.8   | 0.001 |
|                                                          | Genotype x Treatment | 3 | 8.2      | 10.7    | 0.001 |
| Heading-maturing                                         | Genotype             | 3 | 385.6    | 205.24  | 0.001 |
|                                                          | Treatment            | 1 | ns       | 0.01    | ns    |
|                                                          | Genotype x Treatment | 3 | ns       | 1.49    | ns    |
| Seedling-maturing                                        | Genotype             | 3 | 242.5    | 104.1   | 0.001 |
|                                                          | Treatment            | 1 | 210.1    | 90.2    | 0.001 |
|                                                          | Genotype x Treatment | 3 | 3.3      | 1.4     | ns    |
| Protein and macronutrient/micronutrient content in grain |                      |   |          |         |       |
| N                                                        | Genotype             | 3 | 0.5027   | 188.8   | 0.001 |
|                                                          | Treatment            | 1 | 1.1008   | 413.5   | 0.001 |
|                                                          | Genotype x Treatment | 3 | 0.0597   | 22.4    | 0.001 |
| P                                                        | Genotype             | 3 | 0.009126 | 64.42   | 0.001 |
|                                                          | Treatment            | 1 | 0.005704 | 40.26   | 0.001 |
|                                                          | Genotype x Treatment | 3 | 0.001471 | 10.38   | 0.001 |
| K                                                        | Genotype             | 3 | 0.06110  | 293.30  | 0.001 |
|                                                          | Treatment            | 1 | 0.06510  | 312.50  | 0.001 |
|                                                          | Genotype x Treatment | 3 | 0.00265  | 12.71   | 0.001 |
| Mg                                                       | Genotype             | 3 | 0.000555 | 41.3    | 0.001 |
|                                                          | Treatment            | 1 | 0.000081 | 6.0     | 0.05  |
|                                                          | Genotype x Treatment | 3 | 0.000377 | 28.1    | 0.001 |
| Fe                                                       | Genotype             | 3 | 677.08   | 223.37  | 0.001 |
|                                                          | Treatment            | 1 | 124.22   | 40.98   | 0.001 |
|                                                          | Genotype x Treatment | 3 | 50.66    | 16.71   | 0.001 |
| Mn                                                       | Genotype             | 3 | 18.33    | 9.28    | 0.001 |
|                                                          | Treatment            | 1 | 45.65    | 23.11   | 0.001 |
|                                                          | Genotype x Treatment | 3 | 2.88     | 1.46    | ns    |
| Zn                                                       | Genotype             | 3 | 162.92   | 83.49   | 0.001 |
|                                                          | Treatment            | 1 | 9.13     | 4.68    | 0.05  |
|                                                          | Genotype x Treatment | 3 | 5.97     | 3.06    | ns    |
| Protein                                                  | Genotype             | 3 | 19.64    | 188.8   | 0.001 |
|                                                          | Treatment            | 1 | 43.00    | 413.5   | 0.001 |
|                                                          | Genotype x Treatment | 3 | 2.33     | 22.4    | 0.001 |
| Hormones                                                 |                      |   |          |         |       |
| IAA in roots                                             | Genotype             | 3 | 618.73   | 52.00   | 0.001 |
|                                                          | Treatment            | 1 | 532.04   | 44.72   | 0.001 |
|                                                          | Genotype x Treatment | 3 | 91.90    | 7.72    | 0.01  |
| IAA in shoots                                            | Genotype             | 3 | 115.42   | 25.31   | 0.001 |
|                                                          | Treatment            | 1 | 1159.26  | 254.15  | 0.001 |
|                                                          | Genotype x Treatment | 3 | 73.97    | 16.22   | 0.001 |
| GA in roots                                              | Genotype             | 3 | 199.79   | 100.43  | 0.001 |
|                                                          | Treatment            | 1 | 2398.00  | 1205.42 | 0.001 |
|                                                          | Genotype x Treatment | 3 | 173.40   | 87.16   | 0.001 |
| GA in shoots                                             | Genotype             | 3 | 84.43    | 136.50  | 0.001 |
|                                                          | Treatment            | 1 | 133.58   | 215.96  | 0.001 |

|              |                      |   |        |         |       |
|--------------|----------------------|---|--------|---------|-------|
|              | Genotype x Treatment | 3 | 9.78   | 15.81   | 0.001 |
| tZ in roots  | Genotype             | 3 | 97.52  | 187.623 | 0.001 |
|              | Treatment            | 1 | 98.29  | 189.11  | 0.001 |
|              | Genotype x Treatment | 3 | 199.95 | 384.69  | 0.001 |
| tZ in shoots | Genotype             | 3 | 10.959 | 144.77  | 0.001 |
|              | Treatment            | 1 | 0.788  | 10.412  | 0.01  |
|              | Genotype x Treatment | 3 | 10.344 | 136.64  | 0.001 |

**Table S3.** Primers used in the study

| Plants primers    |                                                                                           |                      |                    |
|-------------------|-------------------------------------------------------------------------------------------|----------------------|--------------------|
| Allel             | Allele-specific primers (5’-3’)                                                           | Fragment length, bp  | Reference          |
| <i>Ppd-D1a</i>    | <b><i>Ppd-D1AF</i></b><br>ACGCCTCCCACTACACTG                                              | 288                  | Beales et al.,2007 |
| <i>Ppd-D1b</i>    | <b><i>Ppd-D1/R1</i></b><br>GTTGGTTCAAACAGAGAGC                                            | 414                  |                    |
|                   | <b><i>Ppd-D1/R2</i></b><br>CACTGGTGGTAGCTGAGATT                                           |                      |                    |
| <i>Vrn-A1a</i>    | <b>VRN1AF</b><br>GAAAGGAAAAATTCTGCTCG                                                     | 715 + 624            | Yan et al., 2004   |
| <i>vrn-A1</i>     | <b>VRN1-1R</b><br>TGCACCTTCCCCCGCCCCAT                                                    | 484                  |                    |
| <i>Vrn-B1a</i>    | <b>Intr1</b><br>ATCATCTTCTCCACCAAGGG                                                      | 1124                 | Fu et al., 2005    |
|                   | <b>Intr1/B/R3</b><br>CTCATGCCAAAAATTGAAGATGA                                              |                      |                    |
| <i>Vrn-D1</i>     | <b>Intr1/D/F</b><br>GTTGTCTGCCTCATCAAATCC                                                 | 1671                 | Fu et al., 2005    |
|                   | <b>Intr1/D/R3</b><br>GGTCACTGGTGGTCTGTGC                                                  |                      |                    |
| Bacterial primers |                                                                                           |                      |                    |
| Genome fragment   | Primers (5’-3’)                                                                           | Reference            |                    |
| 16S rRNA          | <b>27f</b><br>AGAGTTTGATCMTGGCTCAG<br><br><b>1525r</b><br>AAGGAGGTGWTCCARCC               | Lane, 1991           |                    |
| ITS               | <b>FGPL132-38</b><br>CCGGGTTTCCCCATTCGG<br><br><b>FGPS1490-72</b><br>TGCGGCTGGATCACCTCCTT | Normand et al., 1992 |                    |
